# Supplementary material for: Toward a global analysis of metabolites in regulatory mutants of yeast
Source: Springer Nature journal article supplement (doi:10.1007/s00216-011-4800-2), 2011-03-16

**Analytical and Bioanalytical Chemistry**

**Electronic Supplementary Material**

**Toward a global analysis of metabolites in regulatory mutants  
of yeast**

Elizabeth M. Humston, Kenneth M. Dombek, Benjamin P. Tu, Elton T. Young, and  
Robert E. Synovec

**Fig. S1.** RNA and metabolite levels for TCA and glyoxylate cycle genes. The metabolite and RNA levels for *snf1Δ* (A), *adr1Δ* (B), *cat8Δ* (C), and *adr1Δcat8Δ* (D) were normalized to those observed in wildtype and incorporated with RNA data, also normalized to wildtype. The RNA levels were derived from previously published work [27].

## FIGURE S1A

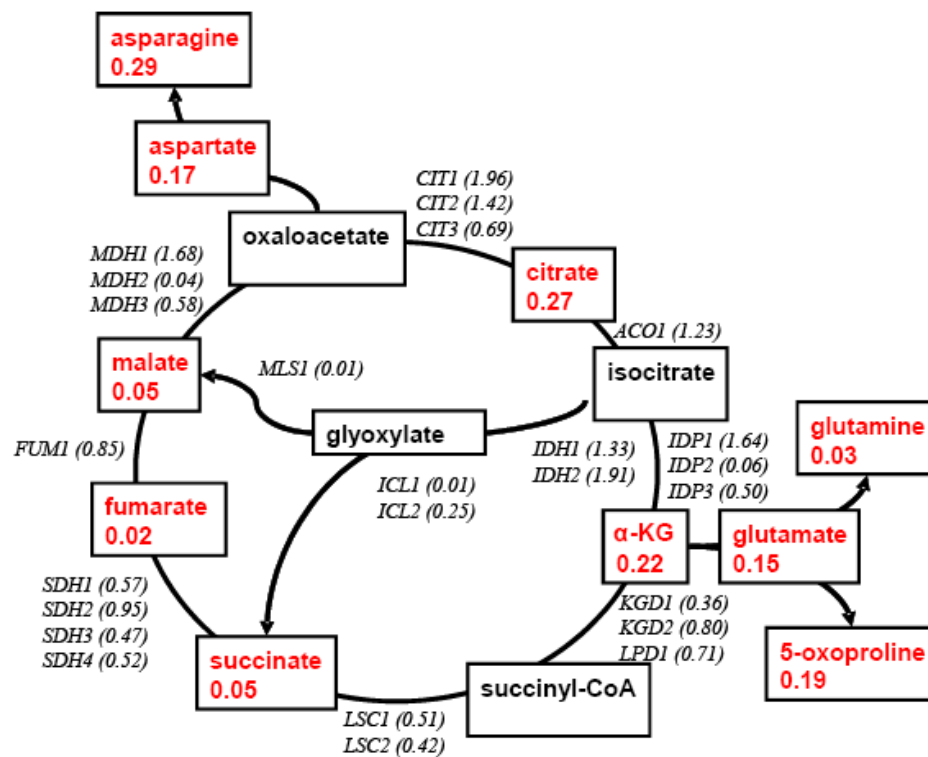

# FIGURE S1B

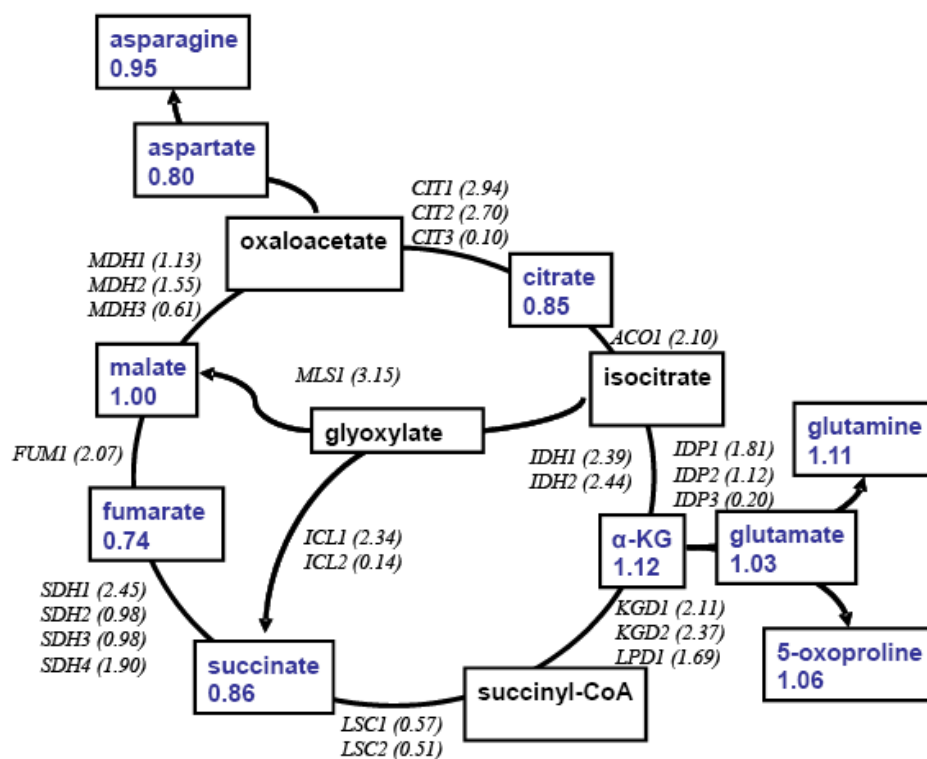

# FIGURE S1C

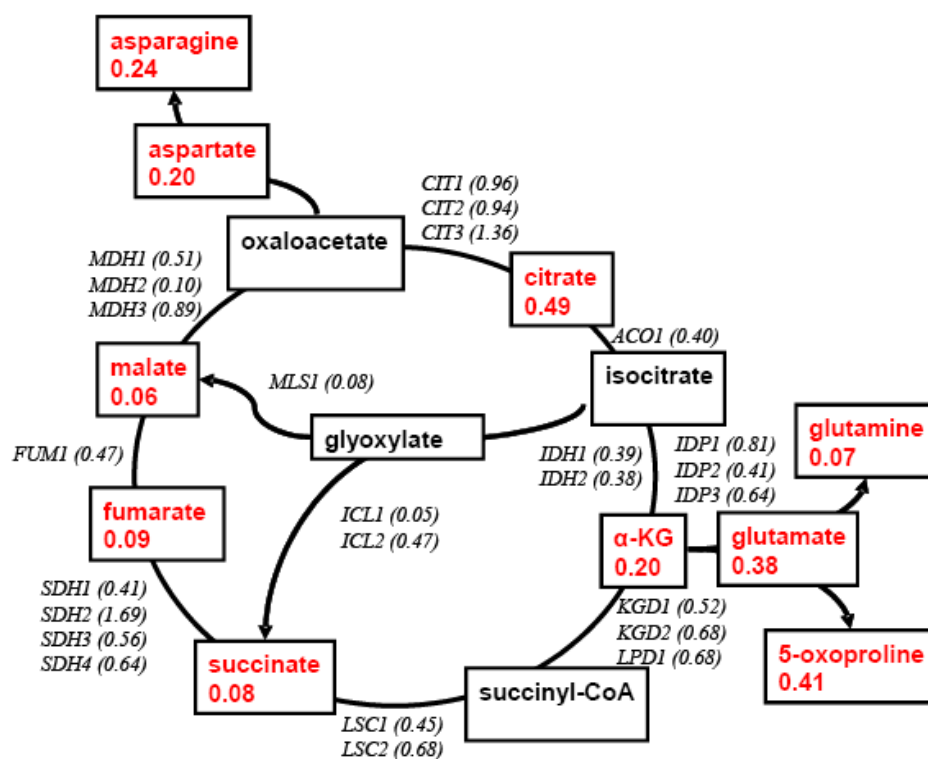

# FIGURE S1D

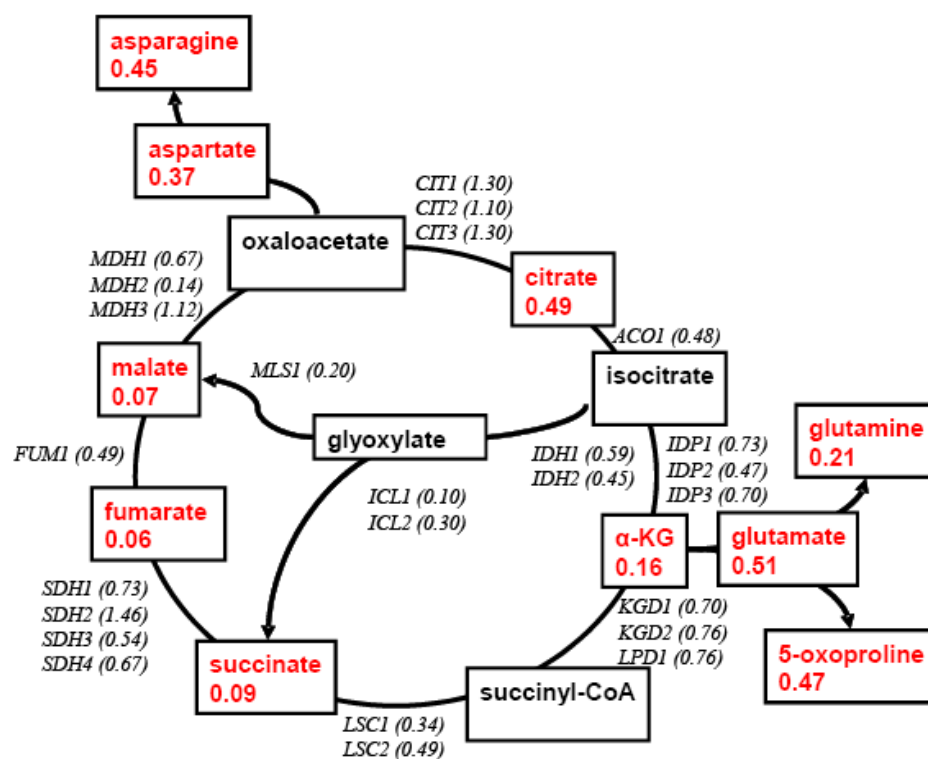

**Fig. S2.** RNA and metabolite levels for gluconeogenesis. The metabolite and RNA levels for *snf1Δ* (A), *adr1Δ* (B), *cat8Δ* (C), and *adr1Δcat8Δ* (D) were normalized to those observed in wildtype and incorporated with RNA data, also normalized to wildtype. The RNA levels were derived from previously published work [27].

## FIGURE S2A

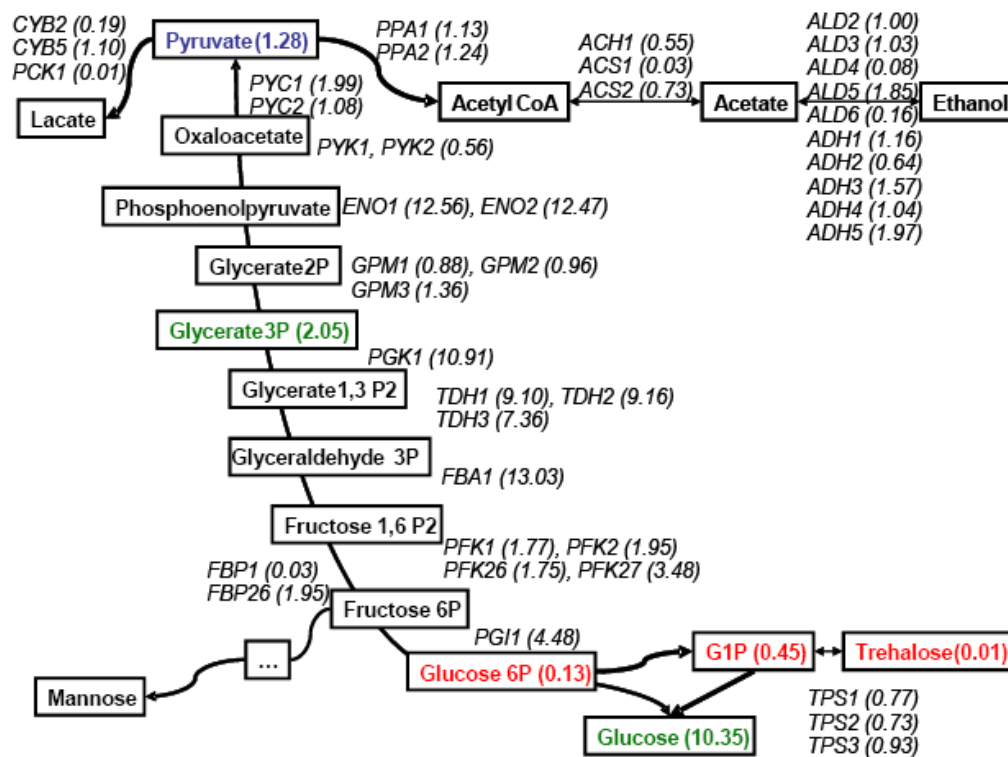

# FIGURE S2B

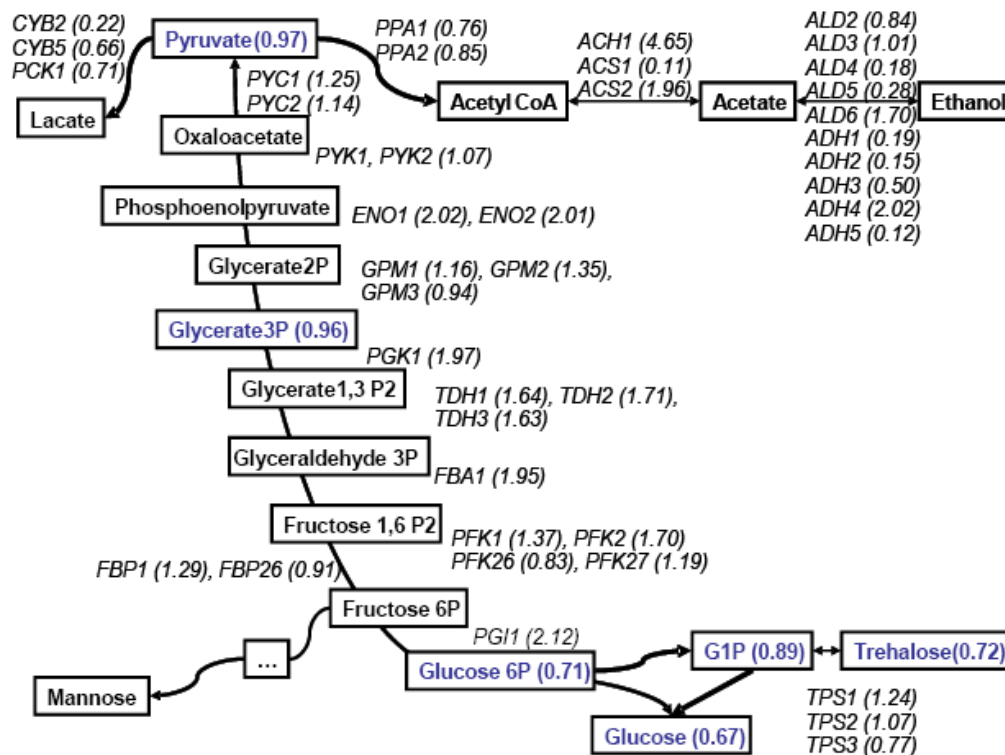

# FIGURE S2C

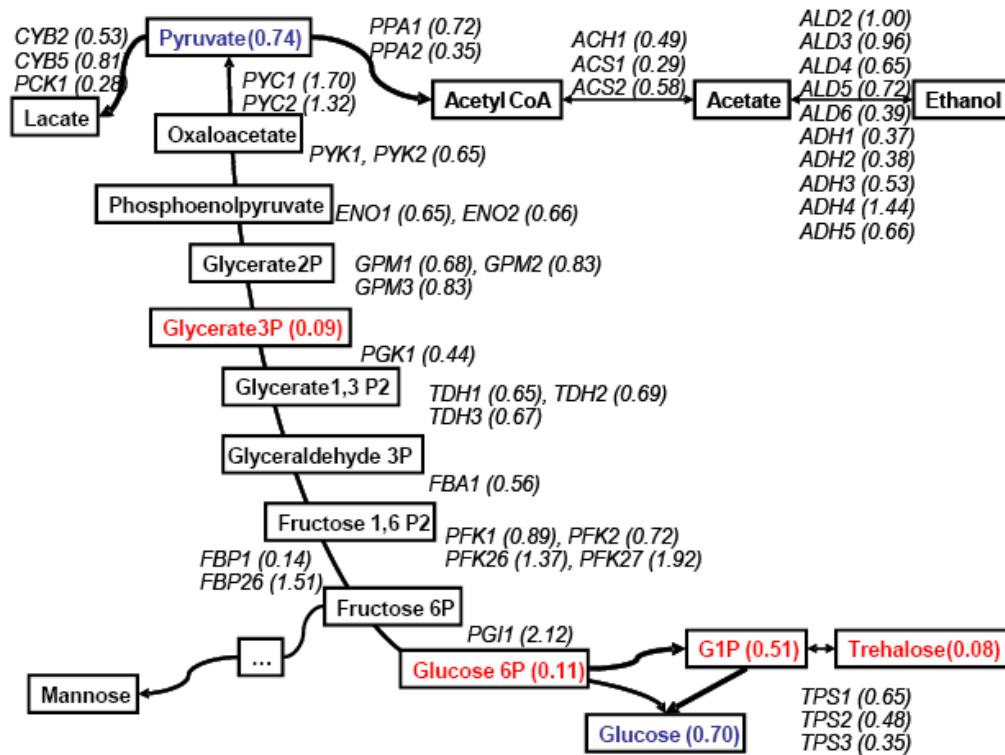



# FIGURE S2D

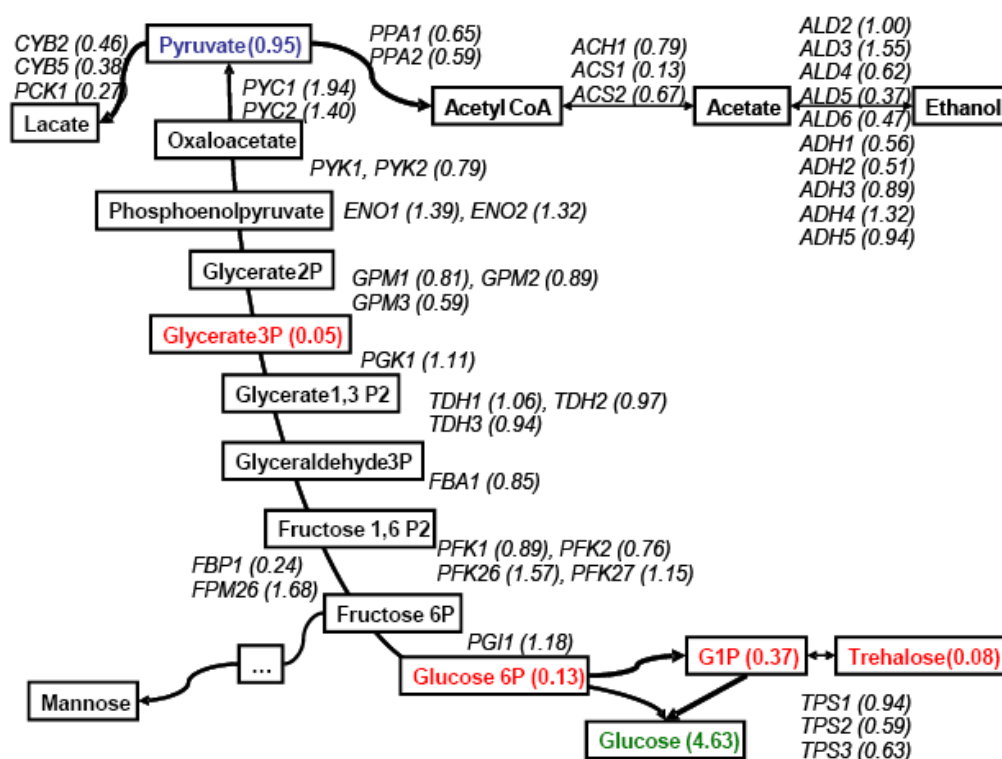

Supplement: MOESM1 [file 216_2011_4800_MOESM1_ESM.pdf]
